# Supplementary material
Source: MDPI journal article supplement (https://www.mdpi.com/2073-4441/16/10/1442)
Supplement: s1 [file s1]

**Table S1.** Borehole lithologic log of Satkhira Assasuni upazila, southwest Bangladesh, Latitude-N 22.6477, Longitude-E 89.17452, sampling method: rotary drilling method (Data source: Directorate of Groundwater Hydrology, BWDB 2022)

| Borehole ID | From depth (m) | To depth(m) | Sediment color | Lithology (gross type) | Hydrostratigraphy   |
|-------------|----------------|-------------|----------------|------------------------|---------------------|
| SABH-2      | 0.0            | 9.2         | Gray           | Clay                   | Aquiclude           |
|             | 9.2            | 18.3        | Gray           | Sandy Clay             | Aquitard            |
|             | 18.3           | 30.5        | Gray           | Clay                   | Aquiclude           |
|             | 30.5           | 36.6        | Gray           | Very Fine Sand         | Aquitard            |
|             | 36.6           | 39.6        | Gray           | Fine Sand              | Fine Sand Aquifer   |
|             | 39.6           | 61.0        | Gray           | Very Fine Sand         | Aquitard            |
|             | 61.0           | 73.2        | Gray           | Fine Sand              | Fine Sand Aquifer   |
|             | 73.2           | 79.3        | Gray           | Very Fine Sand         | Aquitard            |
|             | 79.3           | 97.6        | Light Gray     | Medium Sand            | Medium Sand Aquifer |
|             | 97.6           | 103.7       | Gray           | Very Fine Sand         | Aquitard            |
|             | 103.7          | 109.8       | Light Gray     | Medium Sand            | Medium Sand Aquifer |
|             | 109.8          | 115.9       | Light Gray     | Fine Sand              | Fine Sand Aquifer   |
|             | 115.9          | 118.9       | Gray           | Very Fine Sand         | Aquitard            |
|             | 118.9          | 125.0       | Gray           | Fine Sand              | Fine Sand Aquifer   |
|             | 125.0          | 131.1       | Gray           | Very Fine Sand         | Aquitard            |
|             | 131.1          | 134.2       | Gray           | Fine Sand              | Fine Sand Aquifer   |
|             | 134.2          | 143.3       | Gray           | Very Fine Sand         | Aquitard            |
|             | 143.3          | 152.4       | Gray           | Fine Sand              | Fine Sand Aquifer   |
|             | 152.4          | 161.6       | Gray           | Very Fine Sand         | Aquitard            |
|             | 161.6          | 167.7       | Gray           | Fine Sand              | Fine Sand Aquifer   |
|             | 167.7          | 170.7       | Gray           | Very Fine Sand         | Aquitard            |
|             | 170.7          | 182.9       | Gray           | Medium Sand            | Medium Sand Aquifer |
|             | 182.9          | 204.3       | Gray           | Clay                   | Aquiclude           |
|             | 204.3          | 207.3       | Gray           | Medium Sand            | Medium Sand Aquifer |
|             | 207.3          | 213.4       | Gray           | Fine Sand              | Fine Sand Aquifer   |
|             | 213.4          | 219.5       | Gray           | Medium Sand            | Medium Sand Aquifer |
|             | 219.5          | 237.8       | Gray           | Very Fine Sand         | Aquitard            |
|             | 237.8          | 243.9       | Gray           | Clay                   | Aquiclude           |
|             | 243.9          | 280.5       | Gray           | Very Fine Sand         | Aquitard            |
|             | 280.5          | 283.5       | Gray           | Fine Sand              | Fine Sand Aquifer   |
|             | 283.5          | 286.6       | Gray           | Clay                   | Aquiclude           |

**Table S2a.** Levels of physical parameters, major ions from the groundwater samples during dry season 2020 among 12 monitoring wells of Satkhira district, Bangladesh (Data source: major ions from ICP-MS and IC analysis; physical parameters from BWDB).

| Sample ID   | Latitude              | Longitude | Depth<br>(m) | pH   | EC<br>(μS/cm) | DO   | Temp<br>(°C) | ORP<br>(mv) | As<br>(μg/l) | Fe2+<br>(mg/l) | Ca2+<br>(mg/l) | Mg2+<br>(mg/l) | Na+<br>(mg/l) | K+<br>(mg/l) | Mn2+<br>(mg/l) | HCO3-<br>(mg/l) | SO42-<br>(mg/l) | Cl-<br>(mg/l) |
|-------------|-----------------------|-----------|--------------|------|---------------|------|--------------|-------------|--------------|----------------|----------------|----------------|---------------|--------------|----------------|-----------------|-----------------|---------------|
| SKASPZ-1    | 22.5477               | 89.1745   | 45.5         | 8.17 | 1875.0        | 2.87 | 27.08        | -124.70     | 121.92       | 6.40           | 182.81         | 112.26         | 758.07        | 14.55        | 0.19           | 1170.77         | 1.13            | 2474.91       |
| SKASPZ-2    | 22.5477               | 89.1745   | 111.5        | 8.25 | 1560.0        | 3.00 | 27.10        | -149.50     | 2.02         | 0.42           | 322.85         | 167.53         | 1415.67       | 16.83        | 0.27           | 1903.90         | 64.21           | 4302.84       |
| SKASPZ-3    | 22.5477               | 89.1745   | 205.0        | 8.26 | 3841.0        | 1.03 | 27.30        | -147.70     | 5.60         | 0.26           | 270.21         | 124.13         | 1014.07       | 11.56        | 0.16           | 1062.83         | 100.22          | 2942.26       |
| SKSKPZ-1    | 22.7075               | 89.1261   | 25.0         | 8.26 | 4942.0        | 1.44 | 26.40        | -114.40     | 10.44        | 3.82           | 169.56         | 49.97          | 202.23        | 10.23        | 0.21           | 476.51          | 1.44            | 484.49        |
| SKSKPZ-1/1  | 22.7055               | 89.0694   | 22.3         | 8.24 | 980.0         | 1.72 | 27.05        | -110.60     | 187.68       | 10.51          | 151.37         | 40.13          | 60.25         | 4.31         | 0.11           | 439.31          | 0.22            | 219.08        |
| SKSKPZ-2    | 22.7078               | 89.1262   | 100.0        | 8.25 | 9072.0        | 1.91 | 27.20        | -115.70     | 2.55         | 5.88           | 175.34         | 47.44          | 144.03        | 11.25        | 0.49           | 410.01          | 3.19            | 432.62        |
| SKSKPZ-3    | 22.7078               | 89.1262   | 155.0        | 8.25 | 7025.0        | 2.71 | 26.60        | -95.40      | 4.57         | 1.08           | 114.65         | 51.98          | 624.01        | 9.00         | 0.21           | 290.20          | 9.36            | 1480.97       |
| SKSKPZ-4    | 22.7078               | 89.1262   | 237.0        | 8.20 | 674.0         | 0.86 | 26.58        | -130.70     | 10.00        | 6.10           | 105.97         | 30.43          | 15.85         | 6.73         | 0.09           | 347.36          | 0.36            | 98.15         |
| SKSN2PZ-1   | 22.2789               | 89.3113   | 67.0         | 8.30 | 11110.0       | 1.94 | 28.20        | -53.00      | 16.90        | 23.60          | 684.92         | 223.00         | 1222.42       | 9.15         | 1.19           | 2277.86         | 0.98            | 5049.07       |
| SKSN2PZ-1/1 | 22.2788               | 89.3112   | 30.0         | 8.30 | 4710.0        | 0.40 | 27.60        | 50.40       | 10.29        | 5.27           | 59.77          | 71.55          | 704.94        | 41.98        | 0.62           | 682.05          | 91.97           | 1754.05       |
| SKSN2PZ-2   | 22.2791               | 89.3113   | 116.0        | 8.26 | 9071.0        | 1.32 | 27.75        | -83.00      | 0.96         | 14.55          | 403.53         | 205.05         | 1267.49       | 5.14         | 3.67           | 293.89          | 52.52           | 3054.89       |
| SKSN2PZ-3   | 22.2793               | 89.3113   | 212.0        | 8.28 | 3017.0        | 1.40 | 27.80        | -137.50     | 0.94         | 2.79           | 172.84         | 83.74          | 357.20        | 10.36        | 0.15           | 453.14          | 1.62            | 1362.90       |
|             | Maximum               |           | =            | 8.30 | 11110.0       | 3.00 | 28.20        | 50.40       | 187.68       | 23.60          | 684.92         | 223.00         | 1415.67       | 41.98        | 3.67           | 2277.86         | 100.22          | 5049.07       |
|             | Minimum               |           | =            | 8.17 | 674.0         | 0.40 | 26.40        | -149.50     | 0.94         | 0.26           | 59.77          | 30.43          | 15.85         | 4.31         | 0.09           | 290.20          | 0.22            | 98.15         |
|             | Average               |           | =            | 8.25 | 4823.08       | 1.72 | 27.22        | -100.98     | 45.12        | 6.72           | 234.49         | 100.60         | 648.85        | 12.59        | 0.61           | 817.32          | 27.27           | 1971.35       |
|             | Standard<br>Deviation |           | =            | 0.04 | 3516.82       | 0.82 | 0.54         | 55.09       | 72.46        | 6.75           | 171.37         | 66.42          | 498.66        | 9.92         | 1.01           | 663.84          | 38.81           | 1626.32       |

**Table S2b.** Levels of physical parameters, major ions from the groundwater samples during wet season 2021 among 12 monitoring wells of Satkhira district, Bangladesh (Data source: major ions from ICP-MS and IC analysis; physical parameters from BWDB)

| Sample ID   | Latitude | Longitude                 | Depth (m) | pH   | EC (μS/cm) | DO   | Temp (°C) | ORP (mv) | As (μg/l) | Fe2+ (mg/l) | Ca2+ (mg/l) | Mg2+ (mg/l) | Na+ (mg/l) | K+ (mg/l) | Mn2+ (mg/l) | HCO3- (mg/l) | SO42- (mg/l) | Cl- (mg/l) |
|-------------|----------|---------------------------|-----------|------|------------|------|-----------|----------|-----------|-------------|-------------|-------------|------------|-----------|-------------|--------------|--------------|------------|
| SKASPZ-1    | 22.5477  | 89.1745                   | 45.50     | 7.85 | 30080.0    | 0.61 | 27.45     | -115.70  | 92.42     | 4.27        | 155.28      | 58.78       | 373.19     | 6.07      | 0.05        | 3093.81      | 0.91         | 2272.54    |
| SKASPZ-2    | 22.5477  | 89.1745                   | 111.50    | 7.88 | 17690.0    | 0.58 | 28.10     | -203.30  | 7.93      | 0.22        | 127.30      | 57.09       | 468.36     | 5.78      | 0.06        | 3663.85      | 121.60       | 2586.04    |
| SKASPZ-3    | 22.5477  | 89.1745                   | 205.00    | 8.10 | 8090.0     | 0.52 | 27.29     | -179.70  | 0.68      | 0.15        | 147.23      | 79.75       | 672.71     | 7.94      | 0.12        | 6311.54      | 67.14        | 4371.54    |
| SKSKPZ-1    | 22.7075  | 89.1261                   | 25.00     | 7.85 | 3150.0     | 0.49 | 27.63     | -139.60  | 62.35     | 3.44        | 53.66       | 14.50       | 26.35      | 1.61      | 0.05        | 131.08       | 0.61         | 149.22     |
| SKSKPZ-1/1  | 22.7055  | 89.0694                   | 22.30     | 8.20 | 1850.0     | 0.52 | 27.80     | -118.60  | 48.71     | 2.78        | 52.92       | 14.38       | 25.30      | 1.53      | 0.05        | 7591.52      | 72.60        | 4431.99    |
| SKSKPZ-2    | 22.7078  | 89.1262                   | 100.00    | 7.02 | 5867.0     | 0.56 | 26.00     | -135.90  | 5.22      | 0.36        | 45.14       | 20.91       | 84.62      | 4.60      | 0.00        | 760.10       | 1.47         | 571.61     |
| SKSKPZ-3    | 22.7078  | 89.1262                   | 155.00    | 7.80 | 4549.0     | 0.47 | 26.98     | -128.10  | 8.12      | 2.19        | 74.41       | 21.02       | 83.81      | 4.48      | 0.09        | 7485.68      | 57.01        | 4454.99    |
| SKSKPZ-4    | 22.7078  | 89.1262                   | 237.00    | 8.10 | 5996.0     | 0.51 | 27.01     | -120.90  | 18.03     | 0.01        | 34.73       | 14.81       | 30.85      | 1.90      | 0.00        | 7431.63      | 68.98        | 4324.64    |
| SKSN2PZ-1   | 22.2789  | 89.3113                   | 67.00     | 7.80 | 46450.0    | 0.42 | 28.10     | -9.20    | 3.68      | 5.29        | 176.33      | 189.99      | 1457.15    | 54.03     | 0.75        | 917.67       | 1.72         | 1024.69    |
| SKSN2PZ-1/1 | 22.2788  | 89.3112                   | 30.00     | 7.20 | 54650.0    | 0.47 | 28.40     | -1.70    | 0.16      | 0.73        | 79.07       | 39.03       | 159.40     | 5.14      | 0.04        | 12160.66     | 553.45       | 6892.28    |
| SKSN2PZ-2   | 22.2791  | 89.3113                   | 116.00    | 7.82 | 8646.0     | 0.51 | 27.53     | -11.20   | 0.17      | 0.78        | 83.89       | 40.41       | 162.42     | 5.23      | 0.05        | 994.71       | 0.56         | 828.54     |
| SKSN2PZ-3   | 22.2793  | 89.3113                   | 212.00    | 7.90 | 8026.0     | 0.49 | 27.50     | -19.20   | 0.28      | 0.76        | 76.35       | 36.83       | 147.42     | 4.80      | 0.05        | 1193.77      | 0.00         | 923.49     |
|             |          | <b>Maximum</b>            | =         | 8.20 | 54650.0    | 0.61 | 28.40     | -1.70    | 92.42     | 5.29        | 176.33      | 189.99      | 1457.15    | 54.03     | 0.75        | 12160.66     | 553.45       | 6892.28    |
|             |          | <b>Minimum</b>            | =         | 7.02 | 1850.0     | 0.42 | 26.00     | -203.30  | 0.16      | 0.01        | 34.73       | 14.38       | 25.30      | 1.53      | 0.00        | 131.08       | 0.00         | 149.22     |
|             |          | <b>Average</b>            | =         | 7.79 | 16253.7    | 0.51 | 27.48     | -98.59   | 20.65     | 1.75        | 92.19       | 48.96       | 307.63     | 8.59      | 0.11        | 4311.33      | 78.84        | 2735.96    |
|             |          | <b>Standard Deviation</b> | =         | 0.35 | 17839.7    | 0.05 | 0.64      | 70.06    | 30.42     | 1.80        | 47.36       | 49.02       | 414.38     | 14.44     | 0.20        | 3818.72      | 155.01       | 2127.10    |

**Table S3.** Primary data from 40 monitoring well groundwater sample analysis (Data Source: BWDB 2022 and ICP MS, IC Analysis)

| Well Number | Sample ID  | District | Upazila        | Latitude  | Longitude | Well Depth (Meter) | Dry season           | Wet season           | Dy Season           | Wet Season          |
|-------------|------------|----------|----------------|-----------|-----------|--------------------|----------------------|----------------------|---------------------|---------------------|
|             |            |          |                |           |           |                    | 2020 Salinity (mg/l) | 2021 Salinity (mg/l) | 2020 Arsenic (µg/l) | 2021 Arsenic (µg/l) |
| 01          | BABAPZ-1/1 | Bagerhat | Bagerhat Sadar | 22.710000 | 89.690000 | 30.00              | 734.72               | 985.6                | 50                  | 0                   |
| 02          | BABAPZ-2   | Bagerhat | Bagerhat Sadar | 22.705380 | 89.691700 | 175.00             | 828.16               | 807.68               | 0                   | 0                   |
| 03          | BABAPZ-3   | Bagerhat | Bagerhat Sadar | 22.705340 | 89.691800 | 240.00             | 823.04               | 3683.2               | 0                   | 0                   |
| 04          | BABAPZ-4   | Bagerhat | Bagerhat Sadar | 22.705280 | 89.691800 | 278.00             | 787.84               | 1128.96              | 0                   | 0                   |
| 05          | BARAPZ-1   | Bagerhat | Raeyenda       | 22.315565 | 89.849672 | 58.00              | 12170.88             | 8249.6               | 10                  | 0                   |
| 06          | BARAPZ-2   | Bagerhat | Raeyenda       | 22.315562 | 89.849668 | 116.00             | 705.28               | 11200                | 25                  | 10                  |
| 07          | BARAPZ-3   | Bagerhat | Raeyenda       | 22.315560 | 89.849664 | 180.00             | 2141.44              | 21312                | 25                  | 0                   |
| 08          | BARAPZ-4   | Bagerhat | Raeyenda       | 22.315554 | 89.849660 | 211.00             | 21797.12             | 2341.12              | 25                  | 0                   |
| 09          | KHDUPZ-1   | Khulna   | Dumuria        | 22.809274 | 89.414577 | 55.00              | 1792.00              | 1058.56              | 10                  | 10                  |
| 10          | KHDUPZ-2   | Khulna   | Dumuria        | 22.809261 | 89.414556 | 96.73              | 321.28               | 2010.24              | 10                  | 0                   |
| 11          | KHDUPZ-3   | Khulna   | Dumuria        | 22.809261 | 89.414556 | 254.00             | 335.36               | 1014.4               | 0                   | 0                   |
| 12          | KHDUPZ-4   | Khulna   | Dumuria        | 22.809390 | 89.414550 | 0.00               | 3891.20              | 3948.8               | 0                   | 0                   |
| 13          | KHKHPZ-1   | Khulna   | Noornagar      | 22.839710 | 89.650090 | 61.00              | 2108.16              | 423.68               | 25                  | 50                  |
| 14          | KHKHPZ-2   | Khulna   | Noornagar      | 22.839730 | 89.650130 | 165.00             | 752.64               | 1563.52              | 25                  | 50                  |
| 15          | KHKHPZ-3   | Khulna   | Noornagar      | 22.839760 | 89.650170 | 323.00             | 712.96               | 2280.96              | 0                   | 0                   |
| 16          | KHKHPZ-4   | Khulna   | Noornagar      | 22.832920 | 89.546230 | 0.00               | 7161.60              | 839.04               | 0                   | 0                   |
| 17          | KHPKPZ-1   | Khulna   | Paikgacha      | 22.585084 | 89.318046 | 44.00              | 3214.08              | 852.48               | 50                  | 25                  |
| 18          | KHPKPZ-2   | Khulna   | Paikgacha      | 22.585124 | 89.317974 | 106.00             | 5768.96              | 3520                 | 0                   | 10                  |
| 19          | KHPKPZ-3   | Khulna   | Paikgacha      | 22.585077 | 89.317970 | 190.00             | 9002.24              | 5755.52              | 0                   | 10                  |
| 20          | KHPKPZ-4   | Khulna   | Paikgacha      | 22.585031 | 89.317943 | 245.50             | 12192.64             | 9734.4               | 0                   | 0                   |
| 21          | KHRSPZ-1   | Khulna   | Rupsha         | 22.839710 | 89.650090 | 27.00              | 1528.96              | 12096                | 100                 | 0                   |
| 22          | KHRSPZ-2   | Khulna   | Rupsha         | 22.839730 | 89.650130 | 107.00             | 2413.44              | 2085.76              | 250                 | 0                   |
| 23          | KHRSPZ-3   | Khulna   | Rupsha         | 22.839760 | 89.650170 | 195.00             | 1934.72              | 2830.08              | 0                   | 0                   |
| 24          | KHRSPZ-4   | Khulna   | Rupsha         | 22.839650 | 89.650060 | 264.00             | 1287.68              | 1179.52              | 25                  | 50                  |
| 25          | KHTEPZ-1   | Khulna   | Terokhada      | 22.855990 | 89.801201 | 24.00              | 336.64               | 1817.6               | 25                  | 25                  |

| Well Number | Sample ID   | District | Upazila        | Latitude | Longitude | Well Depth (Meter) | Dry             | Wet             | Dy             | Wet            |
|-------------|-------------|----------|----------------|----------|-----------|--------------------|-----------------|-----------------|----------------|----------------|
|             |             |          |                |          |           |                    | season          | season          | Season         | Season         |
|             |             |          |                |          |           |                    | 2020            | 2021            | 2020           | 2021           |
|             |             |          |                |          |           |                    | Salinity (mg/l) | Salinity (mg/l) | Arsenic (µg/l) | Arsenic (µg/l) |
| 26          | KHTEPZ-2    | Khulna   | Terokhada      | 22.8560  | 89.8012   | 61.00              | 330.24          | 578.56          | 10             | 50             |
| 27          | KHTEPZ-3    | Khulna   | Terokhada      | 22.8560  | 89.8012   | 201.00             | 2699.52         | 2256.64         | 10             | 10             |
| 28          | KHTEPZ-4    | Khulna   | Terokhada      | 22.8560  | 89.8012   | 235.00             | 362.88          | 3064.96         | 100            | 0              |
| 29          | SKASPZ-1    | Satkhira | Asasuni        | 22.5477  | 89.1745   | 45.50              | 1200.00         | 1066.24         | 121.92         | 92.42          |
| 30          | SKASPZ-2    | Satkhira | Asasuni        | 22.5477  | 89.1745   | 111.50             | 998.40          | 19251.2         | 2.02           | 7.93           |
| 31          | SKASPZ-3    | Satkhira | Asasuni        | 22.5477  | 89.1745   | 205.00             | 2458.24         | 11321.6         | 5.60           | 0.68           |
| 32          | SKSKPZ-1    | Satkhira | Satkhira Sadar | 22.7075  | 89.1261   | 25.00              | 3162.88         | 2016            | 10.44          | 62.35          |
| 33          | SKSKPZ-1/1  | Satkhira | Satkhira Sadar | 22.7055  | 89.0694   | 22.30              | 627.20          | 1184            | 187.68         | 48.71          |
| 34          | SKSKPZ-2    | Satkhira | Satkhira Sadar | 22.7078  | 89.1262   | 100.00             | 5806.08         | 3754.88         | 2.55           | 5.22           |
| 35          | SKSKPZ-3    | Satkhira | Satkhira Sadar | 22.7078  | 89.1262   | 155.00             | 4496.00         | 2911.36         | 4.57           | 8.12           |
| 36          | SKSKPZ-4    | Satkhira | Satkhira Sadar | 22.7078  | 89.1262   | 237.00             | 431.36          | 3837.44         | 10             | 18.03          |
| 37          | SKSN2PZ-1   | Satkhira | Shyamnagar     | 22.2789  | 89.3113   | 67.00              | 7110.40         | 29728           | 16.90          | 3.68           |
| 38          | SKSN2PZ-1/1 | Satkhira | Shyamnagar     | 22.2788  | 89.3112   | 30.00              | 3014.40         | 34976           | 10.29          | 0.16           |
| 39          | SKSN2PZ-2   | Satkhira | Shyamnagar     | 22.2791  | 89.3113   | 116.00             | 5805.44         | 5533.44         | 0.96           | 0.17           |
| 40          | SKSN2PZ-3   | Satkhira | Shyamnagar     | 22.2793  | 89.3113   | 212.00             | 1930.88         | 5136.64         | 0.94           | 0.28           |

**Table S4a.** Ranks of Interpolation models and cross validation data from geostatistical wizard for salinity during dry season 2020 and wet season 2021 in the extended study area boundary as shown in [Figure 2](#).

| Description of Interpolation Model                     | Rank | Salinity        |         | Description of Interpolation Model    | Rank | Salinity        |         |
|--------------------------------------------------------|------|-----------------|---------|---------------------------------------|------|-----------------|---------|
|                                                        |      | Dry Season 2020 |         |                                       |      | Wet Season 2021 |         |
|                                                        |      | RMSE            | CV Mean |                                       |      | RMSE            | CV Mean |
| Radial Basis Functions - Completely regularized spline | 1    | 3436.52         | -651.23 | Ordinary Kriging – Optimized          | 1    | 5691.81         | -473.51 |
| Ordinary Kriging – Default                             | 2    | 4262.11         | 44.39   | Radial Basis Functions - Multiquadric | 2    | 7006.44         | 16.08   |
| Empirical Bayesian Kriging - Advanced                  | 3    | 4361.03         | -243.81 | Empirical Bayesian Kriging - Advanced | 3    | 7343.96         | -238.14 |

#### Input Dataset example of Table S4a:

C:\RAZ\First Paper 2024\_Comments\Interpolation2024\Interpolation2024.gdb\Dryseason 2020 Salinity (mg/l)

Type: Feature Class

Data field: Dry 2020 Salinity (mg/l)

Coincident Point Method: Use Mean

Records: 34

Method: Radial Basis Functions

Kernel function: Completely Regularized Spline

Parameter: 1.695576391695

Searching neighborhood: Standard

Neighbors to include:15

Include at least: 10

Sector type: Full

Major semiaxis: 25,935.0416860125

Minor semiaxis: 25,935.0416860125

Angle: 0

**Table S4b.** Ranks of Interpolation models and cross validation data from geostatistical wizard for arsenic during dry season 2020 and wet season 2021 in the extended study area boundary as shown in [Figure 2](#).

| Description of Interpolation Model            | Rank | Arsenic         |         | Description of Interpolation Model            | Rank | Arsenic         |         |
|-----------------------------------------------|------|-----------------|---------|-----------------------------------------------|------|-----------------|---------|
|                                               |      | Dry Season 2020 |         |                                               |      | Wet Season 2021 |         |
|                                               |      | RMSE            | CV Mean |                                               |      | RMSE            | CV Mean |
| Ordinary Kriging – Default                    | 1    | 44.930          | -1.09   | Empirical Bayesian Kriging - Advanced         | 1    | 21.51           | -0.89   |
| Empirical Bayesian Kriging - Default          | 2    | 46.550          | -3.58   | Ordinary Kriging – Optimized                  | 2    | 21.61           | -1.07   |
| Radial Basis Functions - Inverse multiquadric | 3    | 50.39           | -2.17   | Radial Basis Functions - Inverse multiquadric | 3    | 24.32           | 0.22    |

**Table S5a.** Pearson Correlation matrix among field parameters and major ions found in the 12 groundwater samples at Satkhira district during dry season 2020

|                        | pH     | EC     | ORP    | As     | Fe     | Ca     | Mg     | Al     | Na     | K      | Mn     | Cu     | Zn     | Ba     | Pb     | HCO <sub>3</sub> | Cl     | NO <sub>3</sub> | SO <sub>4</sub> | PO <sub>4</sub> |
|------------------------|--------|--------|--------|--------|--------|--------|--------|--------|--------|--------|--------|--------|--------|--------|--------|------------------|--------|-----------------|-----------------|-----------------|
| <b>pH</b>              | 1      |        |        |        |        |        |        |        |        |        |        |        |        |        |        |                  |        |                 |                 |                 |
| <b>EC</b>              | 0.536  | 1      |        |        |        |        |        |        |        |        |        |        |        |        |        |                  |        |                 |                 |                 |
| <b>ORP</b>             | 0.530  | 0.380  | 1      |        |        |        |        |        |        |        |        |        |        |        |        |                  |        |                 |                 |                 |
| <b>As</b>              | -0.671 | -0.606 | -0.185 | 1      |        |        |        |        |        |        |        |        |        |        |        |                  |        |                 |                 |                 |
| <b>Fe</b>              | 0.238  | 0.560  | 0.365  | 0.135  | 1      |        |        |        |        |        |        |        |        |        |        |                  |        |                 |                 |                 |
| <b>Ca</b>              | 0.353  | 0.579  | 0.014  | -0.291 | 0.733  | 1      |        |        |        |        |        |        |        |        |        |                  |        |                 |                 |                 |
| <b>Mg</b>              | 0.299  | 0.450  | 0.080  | -0.400 | 0.546  | 0.889  | 1      |        |        |        |        |        |        |        |        |                  |        |                 |                 |                 |
| <b>Al</b>              | 0.389  | 0.535  | 0.582  | -0.282 | 0.561  | 0.392  | 0.554  | 1      |        |        |        |        |        |        |        |                  |        |                 |                 |                 |
| <b>Na</b>              | 0.279  | 0.322  | 0.128  | -0.507 | 0.226  | 0.679  | 0.906  | 0.465  | 1      |        |        |        |        |        |        |                  |        |                 |                 |                 |
| <b>K</b>               | 0.331  | -0.075 | 0.718  | -0.274 | -0.232 | -0.292 | -0.063 | 0.153  | 0.169  | 1      |        |        |        |        |        |                  |        |                 |                 |                 |
| <b>Mn</b>              | 0.248  | 0.585  | 0.284  | -0.292 | 0.569  | 0.509  | 0.639  | 0.934  | 0.498  | -0.140 | 1      |        |        |        |        |                  |        |                 |                 |                 |
| <b>Cu</b>              | 0.486  | 0.501  | 0.851  | -0.292 | 0.383  | 0.065  | 0.187  | 0.749  | 0.182  | 0.583  | 0.569  | 1      |        |        |        |                  |        |                 |                 |                 |
| <b>Zn</b>              | 0.406  | -0.032 | 0.853  | -0.161 | -0.087 | -0.310 | -0.110 | 0.322  | 0.080  | 0.946  | -0.006 | 0.713  | 1      |        |        |                  |        |                 |                 |                 |
| <b>Ba</b>              | -0.335 | 0.187  | -0.153 | 0.114  | 0.448  | 0.554  | 0.483  | -0.042 | 0.342  | -0.195 | 0.066  | -0.190 | -0.340 | 1      |        |                  |        |                 |                 |                 |
| <b>Pb</b>              | 0.032  | 0.218  | 0.104  | -0.177 | -0.240 | -0.236 | -0.242 | -0.065 | -0.020 | -0.067 | -0.081 | -0.039 | -0.005 | -0.317 | 1      |                  |        |                 |                 |                 |
| <b>HCO<sub>3</sub></b> | 0.178  | 0.127  | 0.015  | -0.174 | 0.341  | 0.722  | 0.695  | -0.065 | 0.677  | 0.136  | -0.052 | -0.107 | -0.022 | 0.619  | -0.273 | 1                |        |                 |                 |                 |
| <b>Cl</b>              | 0.303  | 0.346  | 0.100  | -0.433 | 0.372  | 0.813  | 0.934  | 0.335  | 0.949  | 0.107  | 0.374  | 0.088  | 0.000  | 0.486  | -0.116 | 0.847            | 1      |                 |                 |                 |
| <b>NO<sub>3</sub></b>  | -0.261 | 0.032  | 0.067  | 0.137  | 0.360  | 0.422  | 0.457  | -0.072 | 0.394  | 0.143  | -0.078 | -0.075 | -0.006 | 0.839  | -0.289 | 0.685            | 0.556  | 1               |                 |                 |
| <b>SO<sub>4</sub></b>  | 0.352  | -0.042 | 0.298  | -0.412 | -0.286 | 0.012  | 0.312  | 0.329  | 0.568  | 0.574  | 0.203  | 0.339  | 0.544  | -0.245 | -0.113 | 0.172            | 0.394  | -0.094          | 1               |                 |
| <b>PO<sub>4</sub></b>  | -0.068 | -0.004 | -0.138 | 0.080  | -0.141 | -0.190 | -0.374 | -0.285 | -0.323 | -0.355 | -0.281 | -0.421 | -0.294 | -0.149 | 0.703  | -0.251           | -0.305 | -0.305          | -0.510          | 1               |

**Table S5b.** Pearson Correlation matrix among field parameters and major ions found in the 12 groundwater samples at Satkhira district during wet season 2021

|                        | pH     | EC     | As     | ORP    | Fe     | Ca     | Mg     | Al     | Na     | K      | Mn     | Cu     | Zn     | Ba     | Pb     | HCO <sub>3</sub> | Cl     | NO <sub>3</sub> | SO <sub>4</sub> | PO <sub>4</sub> |
|------------------------|--------|--------|--------|--------|--------|--------|--------|--------|--------|--------|--------|--------|--------|--------|--------|------------------|--------|-----------------|-----------------|-----------------|
| <b>pH</b>              | 1      |        |        |        |        |        |        |        |        |        |        |        |        |        |        |                  |        |                 |                 |                 |
| <b>EC</b>              | -0.396 | 1      |        |        |        |        |        |        |        |        |        |        |        |        |        |                  |        |                 |                 |                 |
| <b>As</b>              | 0.266  | -0.076 | 1      |        |        |        |        |        |        |        |        |        |        |        |        |                  |        |                 |                 |                 |
| <b>ORP</b>             | -0.260 | 0.521  | -0.275 | 1      |        |        |        |        |        |        |        |        |        |        |        |                  |        |                 |                 |                 |
| <b>Fe</b>              | 0.157  | 0.336  | 0.585  | 0.208  | 1      |        |        |        |        |        |        |        |        |        |        |                  |        |                 |                 |                 |
| <b>Ca</b>              | 0.168  | 0.545  | 0.045  | 0.027  | 0.430  | 1      |        |        |        |        |        |        |        |        |        |                  |        |                 |                 |                 |
| <b>Mg</b>              | 0.059  | 0.609  | -0.202 | 0.295  | 0.498  | 0.835  | 1      |        |        |        |        |        |        |        |        |                  |        |                 |                 |                 |
| <b>Al</b>              | 0.028  | 0.559  | -0.027 | 0.381  | 0.734  | 0.632  | 0.899  | 1      |        |        |        |        |        |        |        |                  |        |                 |                 |                 |
| <b>Na</b>              | 0.101  | 0.555  | -0.199 | 0.168  | 0.460  | 0.855  | 0.991  | 0.864  | 1      |        |        |        |        |        |        |                  |        |                 |                 |                 |
| <b>K</b>               | -0.018 | 0.570  | -0.216 | 0.393  | 0.582  | 0.645  | 0.949  | 0.972  | 0.921  | 1      |        |        |        |        |        |                  |        |                 |                 |                 |
| <b>Mn</b>              | 0.069  | 0.520  | -0.192 | 0.360  | 0.622  | 0.632  | 0.933  | 0.970  | 0.910  | 0.990  | 1      |        |        |        |        |                  |        |                 |                 |                 |
| <b>Cu</b>              | 0.011  | 0.538  | -0.083 | 0.480  | 0.704  | 0.545  | 0.872  | 0.973  | 0.824  | 0.965  | 0.966  | 1      |        |        |        |                  |        |                 |                 |                 |
| <b>Zn</b>              | 0.024  | 0.659  | -0.084 | 0.427  | 0.678  | 0.715  | 0.947  | 0.979  | 0.911  | 0.976  | 0.970  | 0.960  | 1      |        |        |                  |        |                 |                 |                 |
| <b>Ba</b>              | 0.077  | 0.158  | 0.622  | -0.424 | 0.397  | 0.575  | 0.164  | 0.140  | 0.204  | 0.012  | -0.009 | -0.032 | 0.130  | 1      |        |                  |        |                 |                 |                 |
| <b>Pb</b>              | 0.178  | 0.235  | 0.071  | 0.182  | 0.790  | 0.342  | 0.626  | 0.826  | 0.611  | 0.769  | 0.838  | 0.833  | 0.768  | -0.023 | 1      |                  |        |                 |                 |                 |
| <b>HCO<sub>3</sub></b> | -0.003 | 0.376  | -0.172 | 0.106  | -0.129 | -0.115 | -0.072 | -0.052 | -0.073 | -0.051 | -0.015 | -0.113 | -0.007 | -0.188 | 0.015  | 1                |        |                 |                 |                 |
| <b>Cl</b>              | 0.056  | 0.270  | -0.136 | -0.063 | -0.280 | -0.077 | -0.184 | -0.252 | -0.162 | -0.241 | -0.207 | -0.333 | -0.185 | -0.059 | -0.197 | 0.955            | 1      |                 |                 |                 |
| <b>NO<sub>3</sub></b>  | 0.119  | 0.339  | 0.630  | -0.176 | 0.298  | 0.401  | 0.000  | -0.013 | 0.010  | -0.150 | -0.160 | -0.174 | 0.010  | 0.801  | -0.178 | 0.297            | 0.413  | 1               |                 |                 |
| <b>SO<sub>4</sub></b>  | -0.417 | 0.608  | -0.252 | 0.258  | -0.283 | -0.087 | -0.104 | -0.198 | -0.126 | -0.140 | -0.152 | -0.181 | -0.077 | -0.223 | -0.243 | 0.757            | 0.748  | 0.197           | 1               |                 |
| <b>PO<sub>4</sub></b>  | 0.153  | 0.317  | 0.240  | 0.241  | 0.668  | 0.312  | 0.593  | 0.760  | 0.560  | 0.701  | 0.699  | 0.803  | 0.688  | 0.036  | 0.654  | -0.211           | -0.404 | -0.069          | -0.314          | 1               |



Table S6a. Depthwise heavy mineral distribution

| Heavy Mineral Wt % |          |           |                       |                   |            |                 |                 |        |        |           |            |
|--------------------|----------|-----------|-----------------------|-------------------|------------|-----------------|-----------------|--------|--------|-----------|------------|
| Sample ID          | Latitude | Longitude | HA-03<br>Depth<br>(m) | Strongly Magnetic | Moderately | Weakly magnetic | Poorly magnetic | Dry    | Wet    | Dry sea-  | Wet Season |
|                    |          |           |                       | (Magnetite,       | magnetic   | (Rutile,        | (Apatite,       | season | season | son 2020, | 2021,      |
|                    |          |           |                       | Goethite,         | (Biotite,  | (Rutile,        | Kyanite,        | 2020,  | 2021,  | Salinity  | Salinity   |
|                    |          |           |                       | Siderite,         | Garnet)    | Pyrite)         | Zircon,         | As     | As     | (mg/l)    | (mg/l)     |
|                    |          |           |                       | Fe-Oxides)        |            | Silimanite)     | (µg/l)          | (µg/l) |        |           |            |
| SKASPZ-1           | 22.5477  | 89.1745   | 30.48                 | 20.13             | 11.04      | 5.19            | 22.08           | 121.92 | 92.42  | 1200.00   | 1066.24    |
| SKASPZ-2           | 22.54774 | 89.17451  | 111.5                 |                   |            |                 |                 | 2.02   | 7.93   | 998.40    | 19251.20   |
| SKASPZ-3           | 22.5477  | 89.17448  | 205                   |                   |            |                 |                 | 5.60   | 0.68   | 2458.24   | 11321.60   |
| SKSKPZ-1           | 22.7075  | 89.12613  | 25                    |                   |            |                 |                 | 10.44  | 62.35  | 3162.88   | 2016.00    |
| SKSKPZ-1/1         | 22.70546 | 89.0694   | 22.3                  |                   |            |                 |                 | 187.68 | 48.71  | 627.20    | 1184.00    |
| SKSKPZ-2           | 22.7078  | 89.12622  | 121.92                | 20.63             | 5.56       | 7.14            | 22.22           | 2.55   | 5.22   | 5806.08   | 3754.88    |
| SKSKPZ-3           | 22.7078  | 89.12622  | 155                   |                   |            |                 |                 | 4.57   | 8.12   | 4496.00   | 2911.36    |
| SKSKPZ-4           | 22.7078  | 89.12622  | 237                   |                   |            |                 |                 | 10.00  | 18.03  | 431.36    | 3837.44    |
| KHPKPZ-1           | 22.58508 | 89.31805  | 44                    |                   |            |                 |                 | 16.90  | 165.38 | 7110.40   | 29728.00   |
| KHPKPZ-2           | 22.58512 | 89.31797  | 106                   |                   |            |                 |                 | 10.29  | 65.70  | 3014.40   | 34976.00   |
| KHPKPZ-3           | 22.58508 | 89.31797  | 190                   |                   |            |                 |                 | 0.96   | 19.04  | 5805.44   | 5533.44    |
| KHPKPZ-4           | 22.58503 | 89.31794  | 245.5                 | 10.93             | 15.75      | 5.73            | 9.14            | 0.94   | 0.84   | 1930.88   | 5136.64    |

Table S6b. Depthwise heavy minerals wt% among deep, intermideate and shallow aquifers

| Heavy mineral Wt%       |               |               |               |
|-------------------------|---------------|---------------|---------------|
| Well ID                 | HA-03         | HT-06         | HT-11         |
| Well Aquifer Depth (m)  | 30.48 m       | 121.92 m      | 245.5 m       |
| Tourmaline              | 3.90          | 1.59          | 1.24          |
| Goethite                | 3.25          | 7.14          | 4.32          |
| Siderite                | 5.19          | 5.56          | 2.25          |
| Magnetite               | 7.79          | 6.35          | 3.12          |
| Garnet                  | 3.25          | 2.38          | 5.62          |
| Biotite                 | 7.79          | 3.17          | 10.13         |
| Rutile                  | 3.25          | 2.38          | 2.3           |
| Pyrite                  | 1.95          | 4.76          | 3.43          |
| Apatite                 | 6.49          | 4.76          | 2.45          |
| Zircon                  | 5.19          | 4.76          | 2.11          |
| Kyanite                 | 4.55          | 4.76          | 1.4           |
| Silimanite              | 5.84          | 7.94          | 3.18          |
| Chlorite/<br>Chloritoid | 8.11          | 3.97          | 5.25          |
| Opaques                 | 33.45         | 40.48         | 53.2          |
| <b>Total =</b>          | <b>100.00</b> | <b>100.00</b> | <b>100.00</b> |

**Table S7.** Data retrieved in Defrac.EVA from XRD analysis of the sample A-12 in Satkhira district

| Index | Color Icon                                                                        | Pattern #   | Mineral Name | Formula                                  | S-Q (%)             | Conc. Level | System        |
|-------|-----------------------------------------------------------------------------------|-------------|--------------|------------------------------------------|---------------------|-------------|---------------|
| 1     |  | COD 9000468 | Biotite      | Al1.999 K0.5 Mg2.001 O12 Si3             | 16.5                | Major       | Monoclinic    |
| 2     |  | COD 1010928 | Calcite      | Ca C O3                                  | 21.7                | Major       | Rhombo.R.axes |
| 3     |  | COD 9010163 | Chlorite     | Al0.865 Fe0.255 H4 Mg2.292 O9 Si1.588    | 3.8                 | Minor       | Monoclinic    |
| 4     |  | COD 9000083 | Dolomite     | C2 Ca Mg O6                              | 0.6                 | Trace       | Hexagonal     |
| 5     |  | COD 1008766 | Goethite     | Fe H O2                                  | 1.1                 | Minor       | Orthorhombic  |
| 6     |  | COD 9008569 | Graphite     | C                                        | 3.3                 | Minor       | Hexagonal     |
| 7     |  | COD 9013732 | Illite       | Al2 H2 K O12 Si4                         | 9.9                 | Major       | Monoclinic    |
| 8     |  | COD 9009230 | Kaolinite    | Al2 H4 O9 Si2                            | 1.6                 | Minor       | Triclinic     |
| 9     |  | COD 9002514 | Olivine      | Fe0.15 Mg1.85 O4 Si                      | 1.9                 | Minor       | Orthorhombic  |
| 10    |  | COD 9006563 | Pyroxene     | Al1.388 Ca0.742 Fe0.162 Mg0.016 O6 Si1.5 | 1.3                 | Minor       | Monoclinic    |
| 11    |  | COD 5000035 | Quartz       | O2 Si                                    | 8.2                 | Major       | Hexagonal     |
| 12    |  | COD 1011176 | Quartz low   | O2 Si                                    | 25.2                | Major       | Hexagonal     |
| 13    |  | COD 9016599 | Siderite     | C Fe O3                                  | 0.7                 | Trace       | Hexagonal     |
| 14    |  | COD 9011362 | Sulfur       | S8                                       | 4.2                 | Minor       | Orthorhombic  |
|       |                                                                                   |             |              |                                          | Total S-Q (%) = 100 |             |               |

**Table S8.** SEM Data showing elemental weight percentage with respective sample ID among nine sediment samples in Satkhira district.

Auburn University Research Instrumentation Facility (AURIF)

SEM Analysis Date Time: 06/05/2023 6:46:41 PM

Spectrum processing: No peaks omitted

Processing option: All elements analyzed (Normalized)

Number of iterations: 4

Instrument: Zeiss EVO 50

Software: Oxford INCA Microanalysis

| Element<br>(Wt %) | Sample ID |       |       |       |       |       |        |        |        | Mean<br>Wt % | Standard<br>1-Jun-1999<br>12:00 AM |
|-------------------|-----------|-------|-------|-------|-------|-------|--------|--------|--------|--------------|------------------------------------|
|                   | P8-1      | P8-2  | P8-3  | A12-1 | A12-2 | A12-3 | HA03-1 | HA03-2 | HA03-3 |              |                                    |
| O                 | 59.78     | 62.35 | 61.41 | 47.84 | 47.74 | 47.55 | 49.19  | 46.3   | 46.19  | 52.04        | SiO2                               |
| Na                | 1.45      | 0.63  | 2.08  | 2.19  | 1.42  | 1.36  |        |        | 0.77   | 1.41         | Albite                             |
| Mg                |           |       |       | 0.64  |       | 0.52  | 2.01   | 1.49   | 2.2    | 1.37         | MgO                                |
| Al                | 5.17      | 2.77  | 5.29  | 6     | 5.64  | 6.07  | 8.06   | 6.59   | 9.51   | 6.12         | Al2O3                              |
| Si                | 29.88     | 32.84 | 28.05 | 35.9  | 35    | 33.23 | 15.49  | 11.37  | 15.3   | 26.34        | SiO2                               |
| Cl                | 0.57      |       | 0.49  | 1.04  | 2     | 0.98  | 0.9    | 0.43   | 0.62   | 0.88         | KCl                                |
| K                 | 1.89      | 1.41  | 1.44  | 2.34  | 2.06  | 1.97  |        |        | 0.44   | 1.65         | MAD-10 Feldspar                    |
| Ca                | 0.45      |       | 0.6   | 2.01  | 1.69  | 4.14  | 4.64   | 3.06   | 3.42   | 2.50         | Wollastonite                       |
| Fe                | 0.81      |       | 0.65  | 2.05  | 4.45  | 4.18  | 17.1   | 21.11  | 19.01  | 8.67         | Fe                                 |
| Ti                |           |       |       |       |       |       | 2.61   | 7.56   | 1.69   | 3.95         | Ti                                 |
| Mn                |           |       |       |       |       |       |        | 0.61   | 0.85   | 0.73         | Mn                                 |
| Zr                |           |       |       |       |       |       |        | 1.48   |        | 1.48         | Zr                                 |
| Total (Wt %)      | 100       | 100   | 100   | 100   | 100   | 100   | 100    | 100    | 100    |              |                                    |

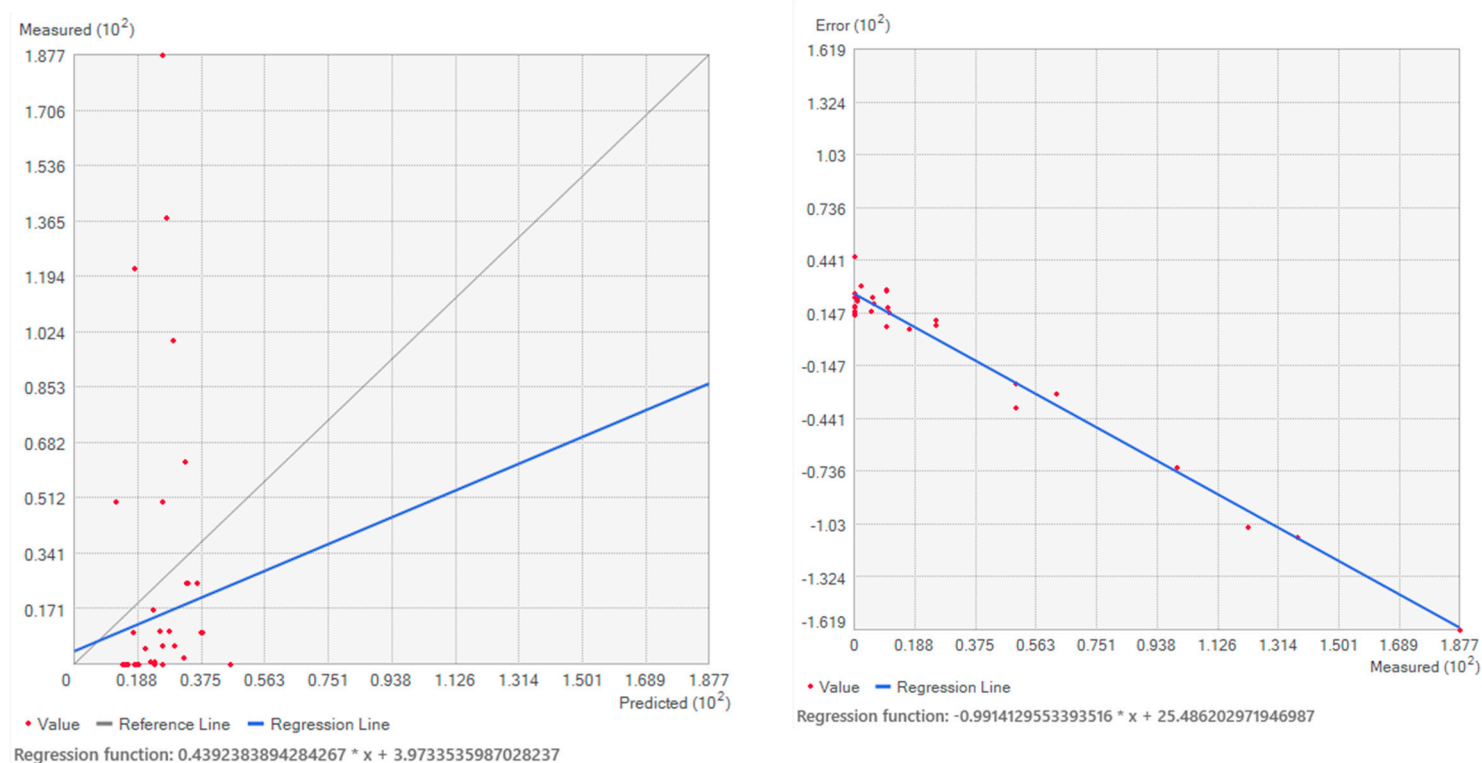

**Figure S1.** Ordinary Kriging interpolation methods showing measured As vs Predicted As and measured As vs Error during Dry season 2020

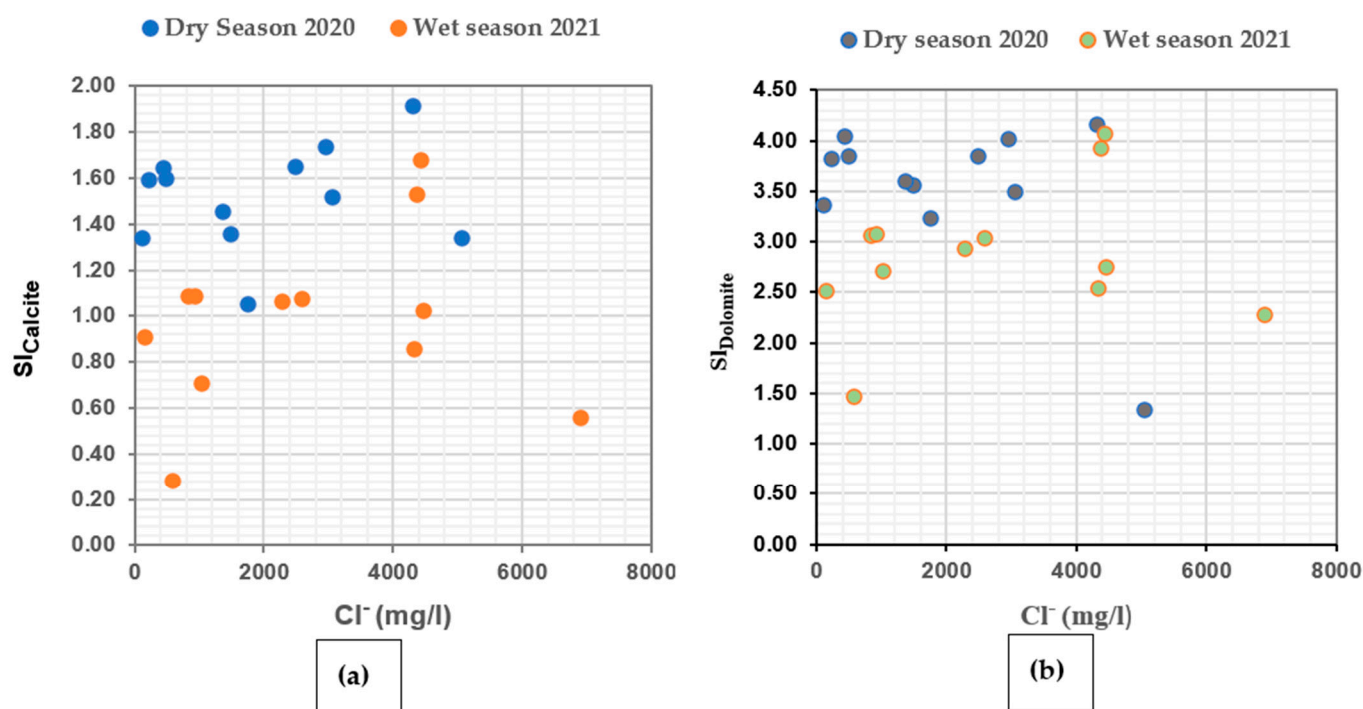

**Figure S2:** Distribution plots of Saturation Index of (a) calcite versus salinity and (b) dolomite versus salinity during wet season 2021 and dry season 2020 in Satkhira district.

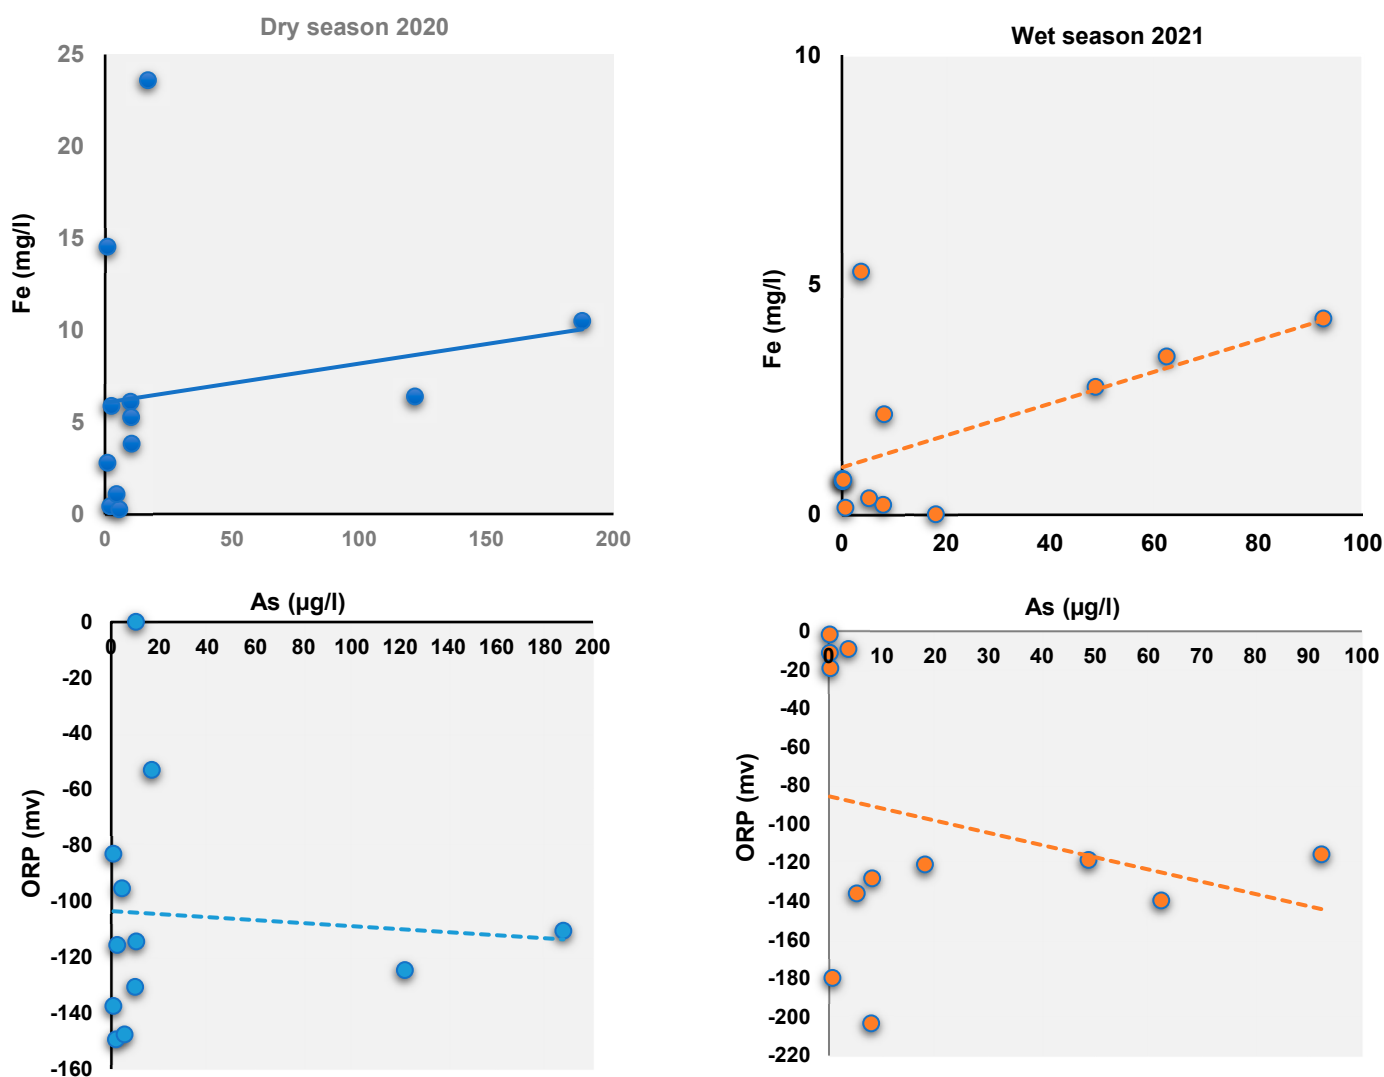

**Figure S3:** Scatter plots showing correlation between As vs Fe , and As vs ORP during dry 2020 and wet season 2021
